# Supplementary material for: Luteal phase anovulatory follicles result in the production of competent oocytes: intra-patient paired case-control study comparing follicular versus luteal phase stimulations in the same ovarian cycle
Source: PubMed Central journal article supplement — Hum Reprod. 2018 Jun 15;33(8):1442–8. doi: 10.1093/humrep/dey217 (PMC6070116; doi:10.1093/humrep/dey217), 2018-06-15
Supplement: dey217suppl_table1.pdf [file dey217suppl_table1.pdf]

**Supplementary Table SI Patient characteristics.**

|                                                      |                          |
|------------------------------------------------------|--------------------------|
| Patients, <i>n</i>                                   | 188                      |
| Maternal age, mean $\pm$ SD (range)                  | 40.0 $\pm$ 2.9 (30–44)   |
| AFC                                                  | 5.0 $\pm$ 2.5 (3–10)     |
| FSH, mIU/ml, mean $\pm$ SD (range)                   | 9.9 $\pm$ 3.3 (3.0–17.0) |
| AMH, ng/ml, mean $\pm$ SD (range)                    | 0.9 $\pm$ 0.6 (0.1–2.0)  |
| BMI, mean $\pm$ SD (range)                           | 22.2 $\pm$ 2.9 (18–27.5) |
| Never conceived previously, <i>n</i> , %             | 113, 60.0%               |
| Conceived previously, <i>n</i> , %                   | 75, 40.0%                |
| Duration of infertility, year, mean $\pm$ SD (range) | 3.1 $\pm$ 2.0 (1–13)     |
| Main cause of infertility, <i>n</i> , %              |                          |
| Idiopathic                                           | 128, 68.1%               |
| Endocrine-ovulatory                                  | 19, 10.1%                |
| Tubal factor                                         | 8, 4.3%                  |
| Male factor                                          | 33, 17.5%                |
| Previous IVF cycles, mean $\pm$ SD (range)           | 1.0 $\pm$ 1.3 (0–6)      |
| Previous ETs, mean $\pm$ SD (range)                  | 0.7 $\pm$ 1.2 (0–6)      |
| Previous miscarriages, mean $\pm$ SD (range)         | 0.4 $\pm$ 0.8 (0–5)      |
| Previous IVF failures, mean $\pm$ SD (range)         | 0.7 $\pm$ 1.0 (0–6)      |
| Sperm, <i>n</i> , %                                  |                          |
| Normozoospermic                                      | 99, 52.7%                |
| MMF                                                  | 53, 28.2%                |
| OAT                                                  | 36, 19.1%                |

FSH, follicle stimulating hormone; AFC, antral follicle count; AMH, anti-mullerian hormone; BMI, body mass index; ET, embryo transfer; MMF, moderate male factor; OAT, oligoasthenoteratozoospermic.
