# Supplementary material for: Luteal phase anovulatory follicles result in the production of competent oocytes: intra-patient paired case-control study comparing follicular versus luteal phase stimulations in the same ovarian cycle
Source: PubMed Central journal article supplement — Hum Reprod. 2018 Jun 15;33(8):1442–8. doi: 10.1093/humrep/dey217 (PMC6070116; doi:10.1093/humrep/dey217), 2018-06-15
Supplement: dey217suppl_table2.pdf [file dey217suppl_table2.pdf]

**Supplementary Table SII McNemar's test comparing the paired rates of patients with blastocyst(s) either produced (+) or not produced (–) after follicular phase stimulation (FPS) and luteal phase stimulation (LPS).**

|                                      | <b>Blastocyst(s) produced after FPS (+)</b> | <b>Blastocyst(s) produced after FPS (–)</b> | <b>Total LPS</b>                  |
|--------------------------------------|---------------------------------------------|---------------------------------------------|-----------------------------------|
| Blastocyst(s) produced after LPS (+) | 97/188, 51.6% (44.2–58.9)                   | 48/188, 25.5% (19.6–32.5)                   | <b>145/188, 77.1% (70.3–82.8)</b> |
| Blastocyst(s) produced after LPS (–) | 30/188, 16.0% (11.2–22.2)                   | 13/188, 6.9% (3.9–11.8)                     | 43/188, 22.9% (17.2–29.7)         |
| Total FPS                            | <b>127/188, 67.6% (60.3–74.1)</b>           | 61/188, 32.4% (25.9–39.7)                   |                                   |

A significantly higher chance of producing blastocysts was reported after LPS than after FPS ( $P = 0.05$ ). In bold, the overall rate of cycles producing blastocyst(s) in FPS and in LPS.
