# Supplementary material for: Luteal phase anovulatory follicles result in the production of competent oocytes: intra-patient paired case-control study comparing follicular versus luteal phase stimulations in the same ovarian cycle
Source: PubMed Central journal article supplement — Hum Reprod. 2018 Jun 15;33(8):1442–8. doi: 10.1093/humrep/dey217 (PMC6070116; doi:10.1093/humrep/dey217), 2018-06-15
Supplement: dey217suppl_table3.pdf [file dey217suppl_table3.pdf]

**Supplementary Table SIII Preliminary clinical outcomes of euploid single blastocyst transfers of embryos obtained after follicular or luteal phase stimulation (FPS or LPS).**

|                                                                             | <b>FPS – 56 patients</b> | <b>LPS – 58 patients</b> |
|-----------------------------------------------------------------------------|--------------------------|--------------------------|
| Number of euploid single blastocyst transfers                               | 66                       | 65                       |
| Number of clinical pregnancies, % of transfers (95%CI)                      | 33, 50.0% (37.6 to 62.4) | 39, 60.0% (47.1 to 71.7) |
| Number of miscarriages, % of clinical pregnancies (95%CI)                   | 5, 15.1% (5.7 to 32.7)   | 4, 10.3% (3.3 to 25.2)   |
| Number of ongoing pregnancies (>22weeks)/deliveries, % of transfers (95%CI) | 28, 42.4% (30.5 to 55.2) | 35, 53.8% (41.1 to 66.1) |
