# Supplementary figures and images for: Luteal phase anovulatory follicles result in the production of competent oocytes: intra-patient paired case-control study comparing follicular versus luteal phase stimulations in the same ovarian cycle
Source: PubMed Central journal article supplement — Hum Reprod. 2018 Jun 15;33(8):1442–8. doi: 10.1093/humrep/dey217 (PMC6070116; doi:10.1093/humrep/dey217), 2018-06-15

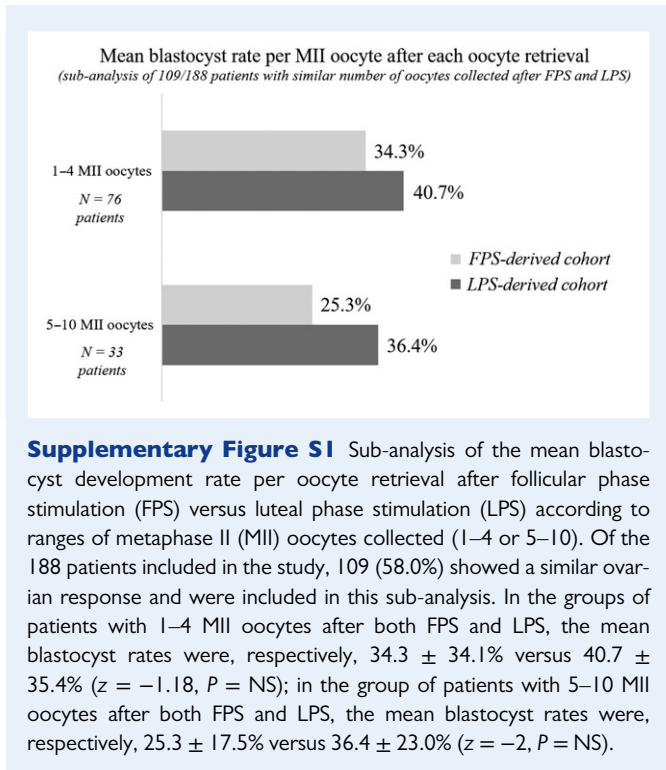

Supplement: dey217suppl_figure1.pdf [file dey217suppl_figure1.pdf]
